# Supplementary material
Source: PubMed Central journal article supplement (PMC11072367)
Supplement: 18_2021_3952_MOESM4_ESM.pdf [file 18_2021_3952_MOESM4_ESM.pdf]

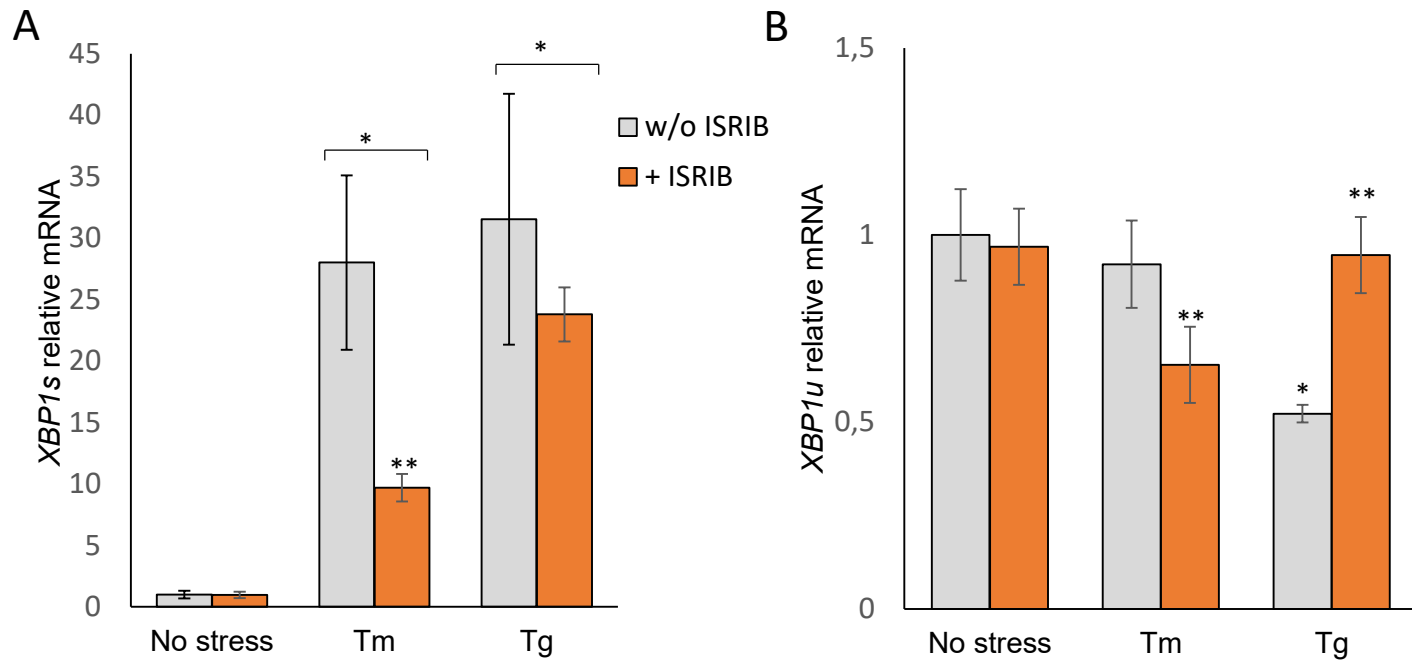

**Supplemental Figure S4.** Consequences of inhibiting PERK arm of UPR for mRNA levels of *XBP1s* (A) and *XBP1u* (B), in HeLa cell lines that were ER stress exposed for 6 hours (0.5  $\mu$ M Tm and 2.5 nM Tg). To prevent PERK signaling integrated stress response inhibitor (ISRIB, Sigma) was used at 1  $\mu$ M concentration. The results from 3 independent experiments (n=9) are plotted normalized to *GAPDH* and *RPLP0* mRNA levels and expressed as a fold-change over the noninduced cells. Error bars represent standard deviations. Significant changes (*P*-value  $P < 0.05$ ) are marked with an asterisk (\*) versus no stress control and double asterisk (\*\*) versus negative siRNA control in respectful treatments.
