# Supplementary material
Source: PubMed Central journal article supplement (PMC11072367)
Supplement: 18_2021_3952_MOESM7_ESM.pdf [file 18_2021_3952_MOESM7_ESM.pdf]

## UPR TF\_motif\_count

Table S3

| Gene_id | Gene name                | Trancription Factors Motifs Count |      |      |      |      |      |     |
|---------|--------------------------|-----------------------------------|------|------|------|------|------|-----|
|         |                          | ATF3                              | ATF4 | ATF5 | ATF6 | XBP1 | CHOP | JUN |
| 43511   | <i>ACLY</i>              | 0                                 | 2    | 2    | 0    | 1    | 2    | 2   |
| 34756   | <i>ATF3</i>              | 4                                 | 13   | 5    | 9    | 6    | 0    | 32  |
| 2136    | <i>BBC3</i>              | 1                                 | 6    | 1    | 3    | 4    | 1    | 11  |
| 730     | <i>CALR</i>              | 4                                 | 12   | 2    | 7    | 14   | 0    | 10  |
| 56595   | <i>CDK6</i>              | 0                                 | 2    | 2    | 3    | 5    | 0    | 0   |
| 46049   | <i>CDKN1A</i>            | 2                                 | 6    | 1    | 6    | 10   | 1    | 32  |
| 53401   | <i>CHAC1</i>             | 1                                 | 6    | 0    | 1    | 1    | 3    | 1   |
| 56332   | <i>CLIP2</i>             | 0                                 | 8    | 4    | 1    | 12   | 5    | 25  |
| 31831   | <i>DHCR24</i>            | 0                                 | 0    | 2    | 0    | 2    | 0    | 15  |
| 7329    | <i>DNAJA1</i>            | 4                                 | 7    | 1    | 2    | 4    | 1    | 6   |
| 20511   | <i>DNAJB2</i>            | 1                                 | 2    | 2    | 2    | 4    | 0    | 11  |
| 56996   | <i>DNAJB9</i>            | 0                                 | 2    | 0    | 5    | 3    | 0    | 1   |
| 45108   | <i>DSP</i>               | 0                                 | 1    | 0    | 4    | 2    | 0    | 0   |
| 16419   | <i>DUSP5</i>             | 1                                 | 11   | 7    | 17   | 12   | 3    | 23  |
| 22962   | <i>DUSP6</i>             | 0                                 | 1    | 0    | 2    | 4    | 0    | 1   |
| 35560   | <i>EDEM1</i>             | 1                                 | 1    | 2    | 7    | 7    | 1    | 12  |
| 12699   | <i>EGR1</i>              | 2                                 | 4    | 2    | 4    | 1    | 1    | 1   |
| 17688   | <i>ERLEC1</i>            | 0                                 | 3    | 1    | 3    | 6    | 3    | 4   |
| 44330   | <i>ERN1</i>              | 0                                 | 1    | 1    | 4    | 4    | 2    | 0   |
| 21218   | <i>FOXJ2</i>             | 1                                 | 4    | 0    | 0    | 4    | 0    | 1   |
| 32034   | <i>GADD45A</i>           | 0                                 | 8    | 1    | 5    | 2    | 2    | 26  |
| 155     | <i>GADD45B</i>           | 0                                 | 10   | 0    | 4    | 2    | 4    | 35  |
| 45824   | <i>HSPA1B</i>            | 1                                 | 4    | 2    | 6    | 13   | 7    | 9   |
| 8793    | <i>HSPA5</i>             | 4                                 | 8    | 3    | 6    | 11   | 2    | 21  |
| 33781   | <i>HSPA6</i>             | 0                                 | 2    | 0    | 0    | 5    | 0    | 8   |
| 51073   | <i>HSPA8</i>             | 0                                 | 0    | 0    | 2    | 1    | 0    | 0   |
| 547     | <i>ICAM1</i>             | 0                                 | 1    | 0    | 2    | 4    | 0    | 1   |
| 18890   | <i>IL1A</i>              | 1                                 | 3    | 0    | 1    | 3    | 0    | 7   |
| 55328   | <i>IL6</i>               | 2                                 | 6    | 5    | 2    | 4    | 2    | 14  |
| 14031   | <i>MAP3K7CL</i>          | 0                                 | 0    | 2    | 5    | 4    | 0    | 0   |
| 16306   | <i>NFKB2</i>             | 4                                 | 6    | 2    | 4    | 11   | 0    | 17  |
| 14190   | <i>RCAN1</i>             | 0                                 | 2    | 0    | 6    | 6    | 0    | 6   |
| 3351    | <i>SEC23B</i>            | 1                                 | 5    | 2    | 0    | 3    | 1    | 0   |
| 4085    | <i>SNAI1</i>             | 1                                 | 1    | 2    | 1    | 5    | 1    | 0   |
| 3011    | <i>TRIB3</i>             | 0                                 | 4    | 1    | 2    | 5    | 1    | 12  |
| 25822   | <i>WARS</i>              | 0                                 | 6    | 3    | 4    | 3    | 7    | 15  |
| 2219    | <i>PPP1R15A (GADD34)</i> | 6                                 | 11   | 8    | 12   | 14   | 9    | 50  |
| 2472    | <i>ZNF432</i>            | 0                                 | 0    | 0    | 3    | 3    | 0    | 0   |
